# Supplementary material for: Coriandrum sativum L.: A Review on Ethnopharmacology, Phytochemistry, and Cardiovascular Benefits
Source: MDPI journal article supplement (doi:10.3390/molecules27010209), 2021-12-30
Supplement: s1 [file s1]

**Supplementary Table S1:** Table of search terms combination and strategy

| Database                                             | Search term combination and strategy                                                                                                                                                                                                                                                                                                                                     |
|------------------------------------------------------|--------------------------------------------------------------------------------------------------------------------------------------------------------------------------------------------------------------------------------------------------------------------------------------------------------------------------------------------------------------------------|
| Pubmed                                               | #1 "coriandrum sativum" OR coriander OR cilantro<br>#2 Cardiovasc* OR hypertens* OR "blood pressure" OR atherosclero* OR myocardial OR cardiology OR cardiac OR heart OR hyperlipid* OR cholesterol<br>#3 "health benefit" OR benefit OR uses OR "clinical effect" OR "clinical use" OR medicin* OR ethnomedicine OR phytotherapy OR ethno?botany<br>#4 #1 AND #2 AND #3 |
| SCOPUS                                               | #1 "coriandrum sativum" OR coriander OR cilantro<br>#2 Cardiovasc* OR hypertens* OR "blood pressure" OR atherosclero* OR myocardial OR cardiology OR cardiac OR heart OR hyperlipid* OR cholesterol<br>#3 "health benefit" OR benefit OR uses OR "clinical effect" OR "clinical use" OR medicin* OR ethnomedicine OR phytotherapy OR ethno?botany<br>#4 #1 AND #2 AND #3 |
| Google Scholar                                       | ("coriandrum sativum" OR coriander OR cilantro) AND (Cardiovasc* OR hypertens* OR "blood pressure" OR atherosclero* OR myocardial OR cardiology OR cardiac OR heart OR hyperlipid* OR cholesterol) AND ("health benefit" OR benefit OR uses OR "clinical effect" OR "clinical use" OR medicin* OR ethnomedicine OR phytotherapy OR ethno?botany)                         |
| Preprint Platform<br>- Medrxiv<br>- Biorxiv          | "coriandrum sativum" OR coriander OR cilantro                                                                                                                                                                                                                                                                                                                            |
| Cochrane Central<br>Register of<br>Controlled Trials | #1 "coriandrum sativum" OR coriander OR cilantro<br>#2 Cardiovasc* OR hypertens* OR "blood pressure" OR atherosclero* OR myocardial OR cardiology OR cardiac OR heart OR hyperlipid* OR cholesterol<br>#3 "health benefit" OR benefit OR uses OR "clinical effect" OR "clinical use" OR medicin* OR ethnomedicine OR phytotherapy OR ethno?botany<br>#4 #1 AND #2 AND #3 |
